# Supplementary material
Source: Springer Nature journal article supplement (https://www.springermedizin.de/resource/supplementary/12947_2014_514_MOESM1_ESM.pdf/9555934)
Supplement: MOESM1 [file 9555934]

REST

STRESS

TRANSPLANT  
ELIGIBILITY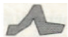

DIP (Dob) →

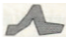

Yes (n= 41)

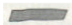

DIP (Dob) →

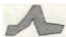

Yes (n= 3 )

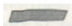

HT →

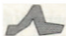

Yes (n=13)

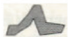

DIP (Dob) →

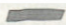

No (n= 15)

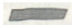

DIP (Dob) →

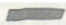

No (n= 3 )

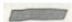

HT →

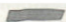

No (n= 2 )
